# Supplementary material for: Correlation of Energy Management Policies with Lower Energy Use in Public Water Systems
Source: Atypon-hosted journal article supplement (doi:10.1061/(asce)wr.1943-5452.0001006), 2018-09-04
Supplement: supplemental_data_wr.1943-5452.0001006_sowby.pdf [file supplemental_data_wr.1943-5452.0001006_sowby.pdf]

## SUPPLEMENTAL DATA

*ASCE Journal of Water Resources Planning and Management*

# Correlation of Energy Management Policies with Lower Energy Use in Public Water Systems

Robert B. Sowby

**DOI:** 10.1061/(ASCE)WR.1943-5452.0001006

© ASCE 2018

[www.ascelibrary.org](http://www.ascelibrary.org)

# ENERGY MANAGEMENT STRATEGY

## COMMITMENT STATEMENT FOR: CENTRAL UTAH WATER CONSERVANCY DISTRICT

Central Utah Water Conservancy District (CUWCD or District) commits to improve energy efficiency and conservation in concert with District goals and operations throughout our District including our headquarters and field offices, dams, raw water conveyance facilities, water treatment plants, District groundwater facilities, and water transmission facilities with both our current infrastructure and with all future upgrades and expansions.

### ACTIONS:

CUWCD staff at each level will work together to carry out this commitment by:

- Examining energy use in concert with other water delivery goals in all aspects of company practices, services, design, maintenance, operation, and purchase of equipment.
- Providing employees with the training and tools they need to identify, communicate, correct, and implement actions and projects that save energy.
- Promoting a culture of energy awareness through improved policies, practices, and procedures.
- Monitoring and tracking energy to achieve the most efficient operations possible.
- Participating in training and incentive programs that support and promote energy management.
- Reviewing and updating energy plans, goals, and objectives on an annual basis.
- Promoting open communication around energy management efforts, so that staff and outside partners, including utility providers are informed about successes and challenges.

### GOALS:

CUWCD is committed to achieving our *Strategic Energy Management* goals:

1. Reduce overall electricity use by 10%, in the next calendar year.
2. Monitor energy performance and account for factors that influence energy use.
3. Develop and implement energy management plans, practices, policies, and standard operating procedures that promote greater energy efficiency.
4. Include energy efficiency as a line item in all facilities planning and design scopes of work.
5. Develop a culture of energy efficiency and opportunity in energy saving ideas.

---

Dave Pitcher  
Executive Sponsor

---

Rick Maloy  
Energy Champion

## **Jordan Valley Water Conservancy District**

### **ENERGY MANAGEMENT GUIDELINE**

Similar to a code of ethics, the District created an energy management guideline to help employees understand what is expected of them in the energy optimization program.

The objectives of this guideline are to consider energy impacts before action is taken, improve energy consumption efficiency when possible, and reduce operational and maintenance costs. JWCD recognizes the financial, environmental, and social benefits associated with saving energy just as it promotes water conservation programs to save water. The guideline is as follows:

#### ***Jordan Valley Water will implement and maintain the following practices:***

- *When conditions permit, utilize the lowest-cost water source first.*
- *Emphasize energy efficiency as a factor when considering new capital projects.*
- *Improve energy efficiency by establishing relationships with external customers and agencies to mutually benefit all parties with energy savings.*
- *Think “outside of the box” when working on routine tasks and daily operations to generate new ideas to conserve energy.*
- *Review demand charges and rate schedule management to reduce overall power costs expended by the district.*
- *Drive further development of internal and external energy efficient innovative technologies.*
- *Encourage continuous energy conservation by employees in their work and personal activities.*
- *Promote a culture of continuous improvement in all aspects of its business including energy management.*

The district recognizes that some positions have a greater influence on energy consumption, but to develop a culture of energy savings, the energy management guideline applies to all JWCD employees.

## Salt Lake City Department of Public Utilities

### Energy Policy

Before beginning to develop and document our energy management practices in this EMP, we set out to establish an energy policy to appropriately guide our efforts. This energy policy will serve as the basis for all energy management decisions:

*SLCDPU uses energy wisely while continuing to exceed the expectations of those we serve. We implement prudent and environmentally responsible strategies and programs in our facilities and operations that minimize our energy use without sacrificing service reliability.*

#### Energy Management Objectives

- Engage in operations and maintenance actions that lead to increased energy efficiency
- Develop and implement energy management plans, practices, policies, and procedures that promote greater efficiency
- Monitor energy use performance
- Save money and resources
- Generate renewable energy
- Demonstrate ourselves as leaders in energy management to our community

#### Energy Management Strategies

- Develop and update the Energy Management Plan on an annual basis
- Train staff and operators in energy efficiency practices
- Inform and engage employees and customers about our energy efficiency goals and progress
- Implement facility improvements that promote efficient energy use Institutionalize capital improvements and asset management for compliance with energy efficiency goals and best practices
- Incorporate energy saving practices into daily routines
- Use advances in technology to efficiently analyze, control, forecast, and monitor facility operations
- Ensure all new construction and major renovations comply with the Net Zero Executive Order and the LEED Executive Order
- Cooperate and partner with City departments, state and federal agencies, and energy utility companies on energy programs
- Appropriately benchmark, audit, re-tune, and retrocommission all facilities and systems to address energy management strategies specific to these facilities and systems
- Identify, prioritize, and implement renewable energy opportunities to offset the energy impacts of operations
- Recognize budgetary needs associated with energy management strategies and work to balance costs and energy savings
- Promote a culture of energy awareness through employee engagement and improved policies and practices
- Monitor and track energy performance to achieve the most efficient operations practicable using benchmarking, energy audits, and retrocommissioning

**2014 ENERGY EFFICIENCY INITIATIVE**  
**Policy Statement for City of Ketchum/Sun Valley**  
**Water & Sewer District Wastewater Treatment Facility**

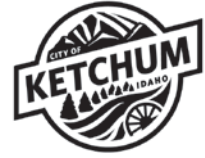

Policy Statement

The City of Ketchum and Sun Valley Water & Sewer District is committed to implementing reliable and cost effective measures toward improving energy efficiency and conservation at the wastewater treatment facility (WWTF).

Actions

WWTF staff will make every feasible effort to carry out this policy in the following ways:

- Consider and implement energy efficiency in all aspects of process, design, maintenance, construction, operation and purchase of all wastewater equipment, practices and services
- Provide employees with the necessary training and tools to identify, communicate, correct and implement more energy saving ideas through improved policies, practices and procedures
- Routinely monitor, track and optimize energy conservation measures to achieve the most efficient operations
- Actively participate in training and incentive programs aimed at energy management
- Review and update energy plans, goals and objectives for energy efficiency and conservation on at least an annual basis
- Periodically communicate energy management efforts to staff and partners, including, but not limited to the Energy Team, City staff and officials, utility providers and associated trades organizations

Goals

The primary initial goals for our Wastewater Energy Conservation Initiative program are as follows:

1. Reduce overall electrical usage by 10% at the wastewater facilities over the calendar years 2014 and 2015, as compared to the approved baseline data
2. Continually monitor electrical energy consumption using the key performance indicators
3. Develop and utilize energy management plans, practices, policies and SOPs that provide and support greater energy efficiencies for our wastewater operations and maintenance activities
4. Replace two inefficient blowers with a new high efficiency turbo blowers
5. Implement various operational and maintenance improvements for improved efficiency gains
6. Operate and maintain all City-designed and constructed sustainability projects in the most prudent way possible to achieve the highest level of energy conservation
- 7.

Officially adopted and approved by:

---

Robyn L. Mattison  
Public Works Director
